# Supplementary material
Source: PubMed Central journal article supplement (PMC6278902)

**Supplemental Table 1.** Median survival (days) of B16F10 tumor-bearing mice post-treatment with TRT, single ICI, dual ICI, or TRT + dual ICI.

| Treatment group      | Experiment | N       | Days till palpable | Survival from injection, days median (min-max) | Survival from treatment, days median (min-max) | Adjusted p-value**** (compare to #1 Control) | Adjusted p-value**** (compare to #8) | Adjusted p-value**** (compare to #9) |
|----------------------|------------|---------|--------------------|------------------------------------------------|------------------------------------------------|----------------------------------------------|--------------------------------------|--------------------------------------|
| 1. Control*          | 1, 2, 3    | 6, 4, 4 | 8, 7, 8            | 14 (14-15)                                     | 7 (6-8)                                        | ---                                          | <0.001                               | <0.001                               |
| 2. CTLA-4**          | 2          | 8       | 7                  | 15.5 (15-18)                                   | 7.5 (7-10)                                     | 0.97                                         | <0.001                               | <0.001                               |
| 3. PD-1***           | 2          | 8       | 7                  | 15.5 (14-18)                                   | 7.5 (6-10)                                     | 0.99                                         | <0.001                               | <0.001                               |
| 4. PD-L1             | 3          | 8       | 7                  | 15.5 (14-17)                                   | 7.5 (6-9)                                      | >0.99                                        | <0.001                               | <0.001                               |
| 5. PD-1+CTLA4        | 3          | 8       | 7                  | 17.5 (17-20)                                   | 9.5 (9-12)                                     | <0.001                                       | <0.001                               | <0.001                               |
| 6. PD-L1 + CTLA4     | 1          | 8       | 9                  | 18 (17-19)                                     | 9 (8-10)                                       | <0.001                                       | 0.29                                 | <0.001                               |
| 7. Lu-177            | 1, 4       | 6, 6    | 7, 8               | 19 (17-22)                                     | 12 (9-14)                                      | <0.001                                       | 0.002                                | <0.001                               |
| 8. Lu177+PD-1+CTLA4  | 3          | 8       | 7                  | 22 (21-23)                                     | 15 (14-16)                                     | <0.001                                       | ---                                  | 0.20                                 |
| 9. Lu177+PD-L1+CTLA4 | 1          | 8       | 8                  | 23 (21-24)                                     | 15 (13-16)                                     | <0.001                                       | 0.22                                 | ---                                  |

\*Describe treatment group details here, including that the radiation dose of <sup>177</sup>Lu-LLP2A is below the maximum tolerated dose (MTD) in tumor bearing mice.

\*\*

\*\*\* etc

\*\*\*\* linear mixed effects regression model with log(survival days from treatment) as outcome, with random experiment effects, days from injection to palpation as a covariate, and treatment group as the covariate of interest. Multiple comparisons in each column adjusted using Dunnett's test.

All treatment groups significantly improved over control (P < 0.005)

All immunotherapy groups not significantly different except PD-L1 vs PD-L1 + CTLA-4 (P=0.0082)

<sup>177</sup>Lu-LLP2A + immunotherapy significantly improved over <sup>177</sup>Lu-LLP2A (P < 0.001)

<sup>177</sup>Lu-LLP2A + immunotherapy significantly improved over dual immunotherapy (P<0.0005)

**Supplemental Table 2.** Uptake (%ID/g) of <sup>177</sup>Lu-LLP2A in tissues and organs for ICR normal mice from 1 h to 7 day post-injection

| % ID/g          | 1 hr          | 2 hr         | 4 hr         | 12 hr        | 24 hr       | 48 hr       | 5 days      | 7 days      |
|-----------------|---------------|--------------|--------------|--------------|-------------|-------------|-------------|-------------|
| Blood           | 1.14 ± 0.29   | 0.38 ± 0.04  | 0.37 ± 0.04  | 0.11 ± 0.02  | 0.03 ± 0.01 | 0.03 ± 0.01 | 0.01 ± 0.00 | 0.02 ± 0.01 |
| Lungs           | 4.73 ± 0.35   | 3.99 ± 0.51  | 2.61 ± 0.08  | 1.21 ± 0.30  | 0.48 ± 0.17 | 0.32 ± 0.12 | 0.47 ± 0.81 | 0.03 ± 0.03 |
| Liver           | 2.04 ± 0.38   | 1.11 ± 0.43  | 1.16 ± 0.28  | 1.58 ± 0.55  | 0.91 ± 0.59 | 0.76 ± 0.19 | 0.47 ± 0.26 | 0.36 ± 0.19 |
| Spleen          | 27.45 ± 10.71 | 22.26 ± 8.53 | 15.19 ± 4.01 | 11.86 ± 3.65 | 5.96 ± 1.51 | 4.20 ± 1.64 | 5.23 ± 2.01 | 2.07 ± 2.04 |
| Kidney          | 3.59 ± 0.73   | 1.96 ± 0.49  | 2.40 ± 0.20  | 2.18 ± 0.32  | 1.11 ± 0.14 | 0.62 ± 0.14 | 0.27 ± 0.06 | 0.11 ± 0.05 |
| Bladder         | 10.05 ± 7.51  | 1.74 ± 1.32  | 6.99 ± 10.14 | 1.41 ± 1.01  | 0.55 ± 0.20 | 0.33 ± 0.13 | 0.16 ± 0.10 | 0.09 ± 0.08 |
| Gallbladder     | 13.52 ± 9.70  | 0.92 ± 1.15  | 0.80 ± 0.72  | 2.91 ± 2.53  | 4.14 ± 3.32 | 1.04 ± 1.44 | 0.17 ± 0.34 | 0.26 ± 0.27 |
| Muscle          | 1.41 ± 0.36   | 1.13 ± 0.36  | 1.21 ± 0.52  | 0.49 ± 0.22  | 0.20 ± 0.02 | 0.14 ± 0.04 | 0.11 ± 0.06 | 0.34 ± 0.31 |
| Fat             | 0.67 ± 0.37   | 0.39 ± 0.26  | 0.43 ± 0.23  | 0.19 ± 0.04  | 0.09 ± 0.05 | 0.05 ± 0.02 | 0.03 ± 0.03 | 0.22 ± 0.46 |
| Heart           | 0.83 ± 0.19   | 0.30 ± 0.24  | 0.44 ± 0.13  | 0.20 ± 0.07  | 0.09 ± 0.01 | 0.06 ± 0.01 | 0.03 ± 0.01 | 0.14 ± 0.28 |
| Brain           | 0.08 ± 0.02   | 0.16 ± 0.23  | 0.03 ± 0.00  | 0.02 ± 0.01  | 0.01 ± 0.00 | 0.02 ± 0.02 | 0.00 ± 0.00 | 0.01 ± 0.01 |
| Bone+Marrow     | 6.92 ± 2.45   | 3.91 ± 1.44  | 3.45 ± 0.74  | 3.78 ± 0.76  | 1.65 ± 0.58 | 1.35 ± 0.25 | 0.93 ± 0.15 | 0.97 ± 0.84 |
| Adrenals        | 1.74 ± 1.10   | 0.45 ± 0.38  | 0.61 ± 0.09  | 0.97 ± 0.50  | 0.31 ± 0.11 | 0.23 ± 0.17 | 0.11 ± 0.09 | 0.04 ± 0.04 |
| Thyroid         | 1.61 ± 0.30   | 1.80 ± 1.33  | 1.45 ± 1.09  | 0.56 ± 0.21  | 0.26 ± 0.10 | 0.25 ± 0.19 | 0.06 ± 0.02 | 0.03 ± 0.04 |
| Pancreas        | 0.84 ± 0.17   | 1.56 ± 1.95  | 0.50 ± 0.11  | 0.57 ± 0.32  | 0.17 ± 0.06 | 0.13 ± 0.11 | 0.06 ± 0.04 | 0.38 ± 0.80 |
| Thymus          | 5.03 ± 1.41   | 3.37 ± 3.71  | 3.73 ± 0.92  | 4.40 ± 0.57  | 1.45 ± 0.23 | 0.91 ± 0.60 | 0.74 ± 0.37 | 0.18 ± 0.17 |
| Stomach         | 0.66 ± 0.08   | 1.55 ± 2.17  | 0.62 ± 0.05  | 0.47 ± 0.07  | 0.17 ± 0.03 | 0.07 ± 0.03 | 0.05 ± 0.02 | 0.02 ± 0.02 |
| Small Intestine | 3.94 ± 0.67   | 2.34 ± 0.92  | 2.01 ± 0.21  | 1.37 ± 0.16  | 0.68 ± 0.20 | 0.35 ± 0.11 | 0.21 ± 0.08 | 0.07 ± 0.04 |
| ULI             | 3.62 ± 1.28   | 2.48 ± 1.14  | 2.15 ± 0.45  | 1.51 ± 0.09  | 0.76 ± 0.40 | 0.33 ± 0.07 | 0.18 ± 0.08 | 0.07 ± 0.04 |
| LLI             | 2.18 ± 0.47   | 1.19 ± 0.32  | 1.46 ± 0.22  | 1.17 ± 0.21  | 0.50 ± 0.14 | 0.22 ± 0.04 | 0.13 ± 0.04 | 0.04 ± 0.01 |

**Supplemental Fig 1.** Chemical structure of A) LLP2A B) Cy3-LLP2A and C) Cy3-sLLP2A.

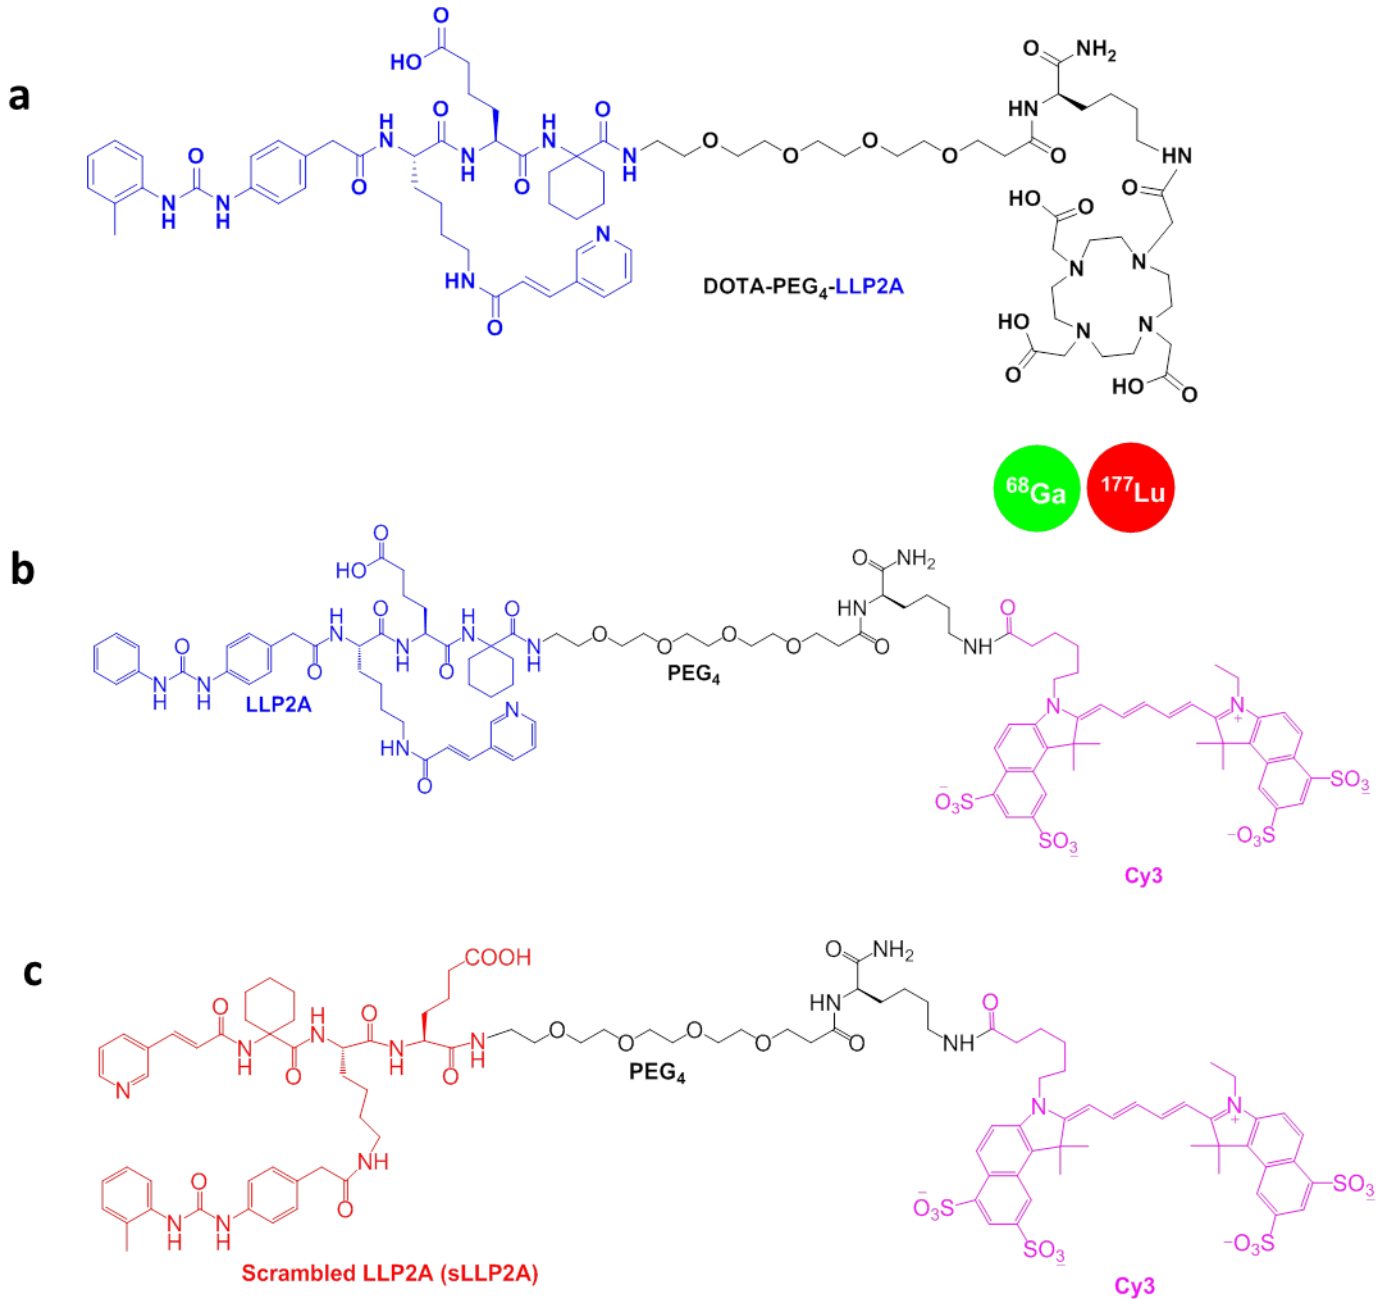

**Supplemental Fig. 2.** Cy3-LLP2A and Cy3-sLLP2A distribution in live cells with Side Scatter (SSC) X-axis and Cy3 signal y-axis. Cy3-sLLP2A (Isotype control) was used to determine as control. Only 1.5 % (n=12) of the isotype Cy3-LLP2A were untaken in live cells via flow cytometry whereas 60.1 % (n=12) of Cy3-LLP2A was untaken in live cells from the collected tumor.

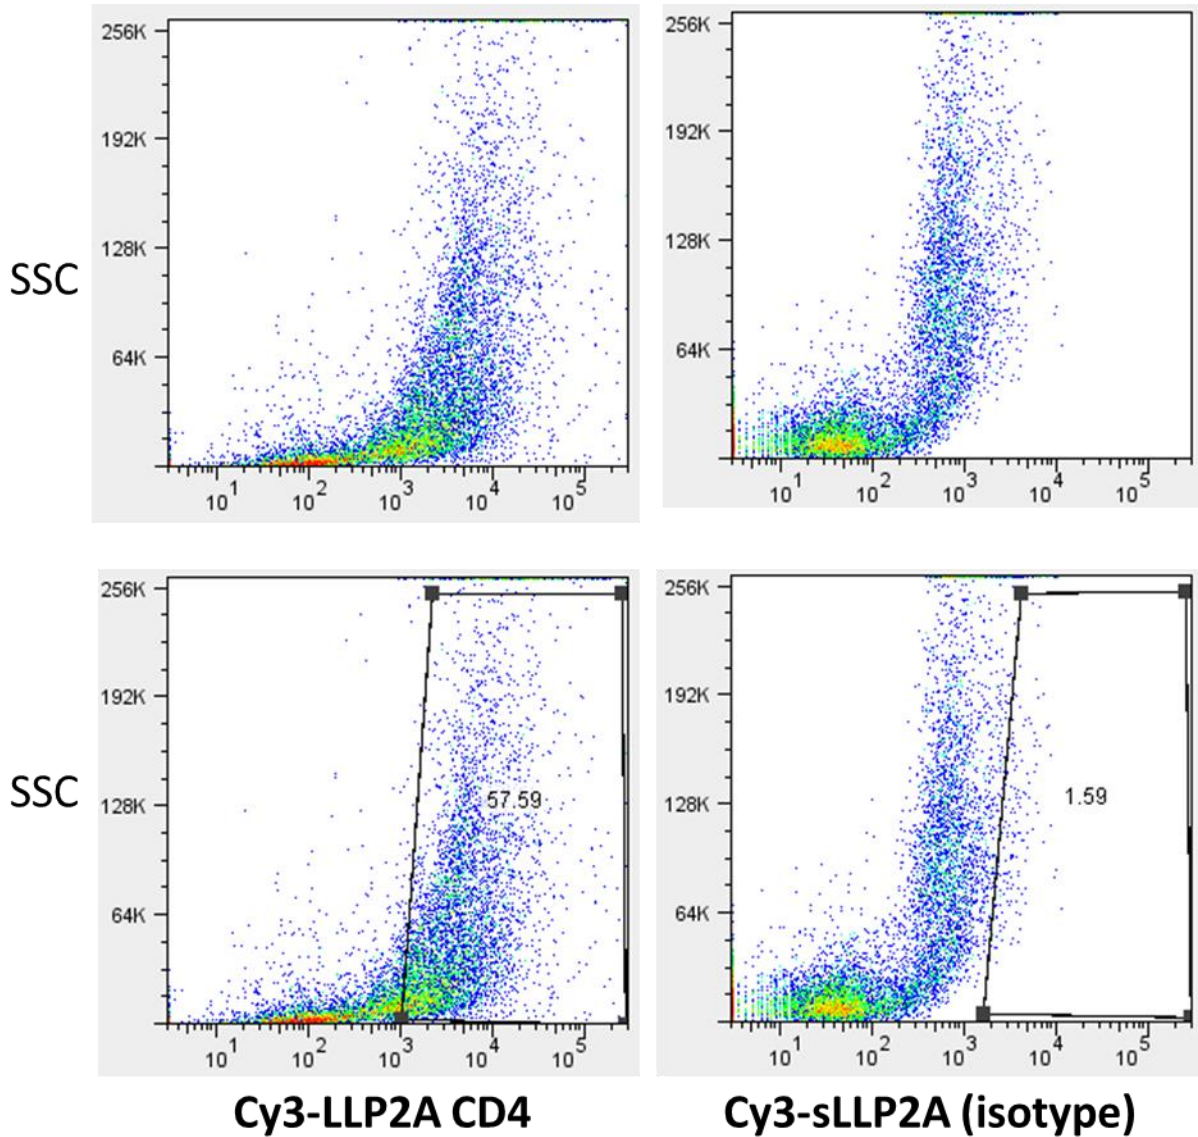

**Supplemental Fig. 3.** The histogram of Cy3-LLP2A and Cy3-scambled LLP2A in collected B16F10 tumor cells (gate live cells). There is no correlation between Cy3-LLP2A and Cy3-sLLP2A localization in B16F10 tumor cells.

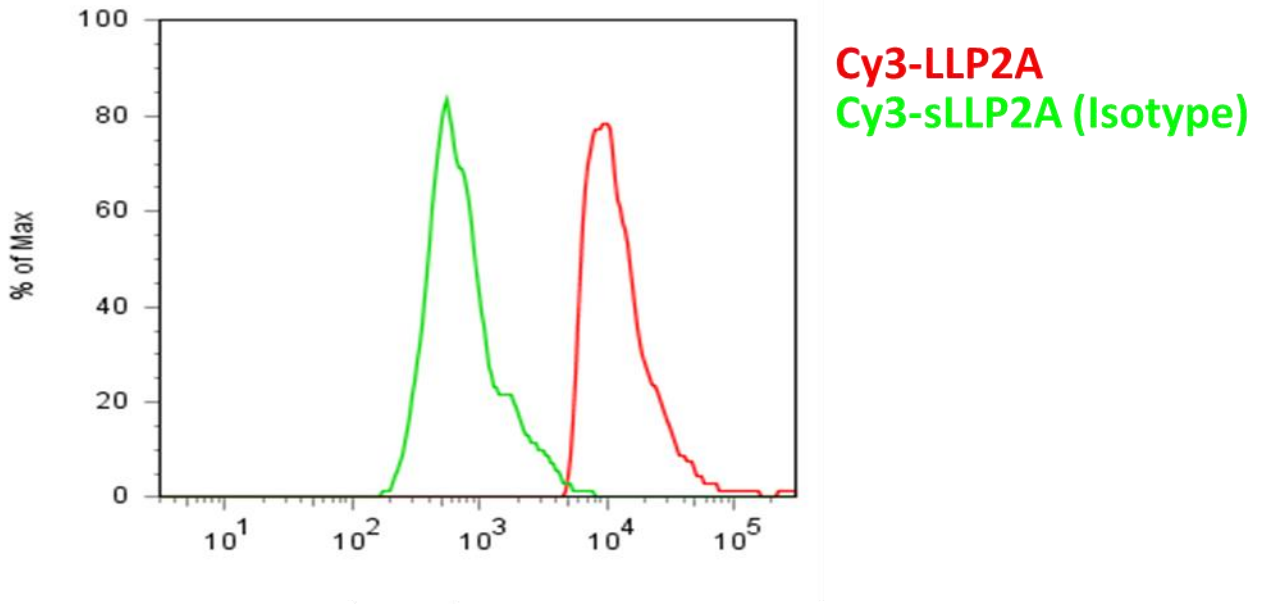

**Supplemental Fig. 4.** Representative contour plot of immune cell markers from collected B16F10 tumor 4 h after injection of Cy3-LLP2A.

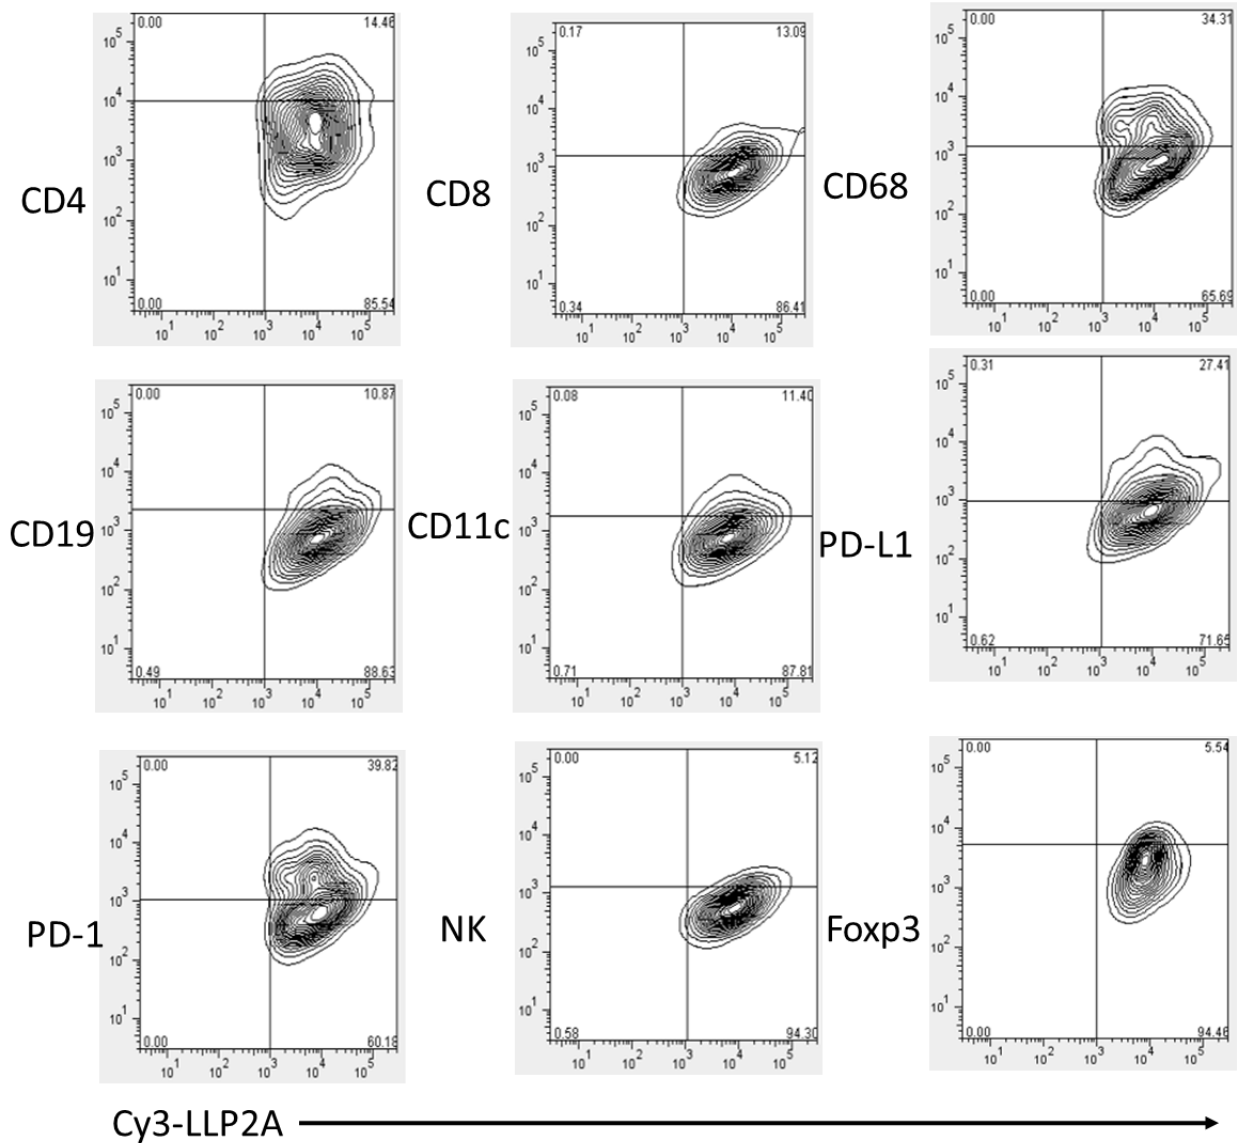

Supplement: jnm209510SupplementalData.pdf [file jnm209510SupplementalData.pdf]
